# Supplementary material for: Superconductivity in Sm-doped [n]phenacenes (n = 3, 4, 5)
Source: Royal Society of Chemistry journal article supplement (doi:10.1039/c4cc07879a), 2014-11-25
Supplement: c4cc07879a1.pdf [file c4cc07879a1.pdf]

Electronic Supplementary Information

**Superconductivity in Sm-doped [n]Phenacenes ( $n=3,4,5$ )**

Gianluca A. Artioli<sup>1</sup>, Franziska Hammerath<sup>2,†</sup>, Maria Cristina Mozzati<sup>2</sup>, Pietro Carretta<sup>2</sup>, Serena Margadonna<sup>3</sup>, and Lorenzo Malavasi<sup>1,\*</sup>

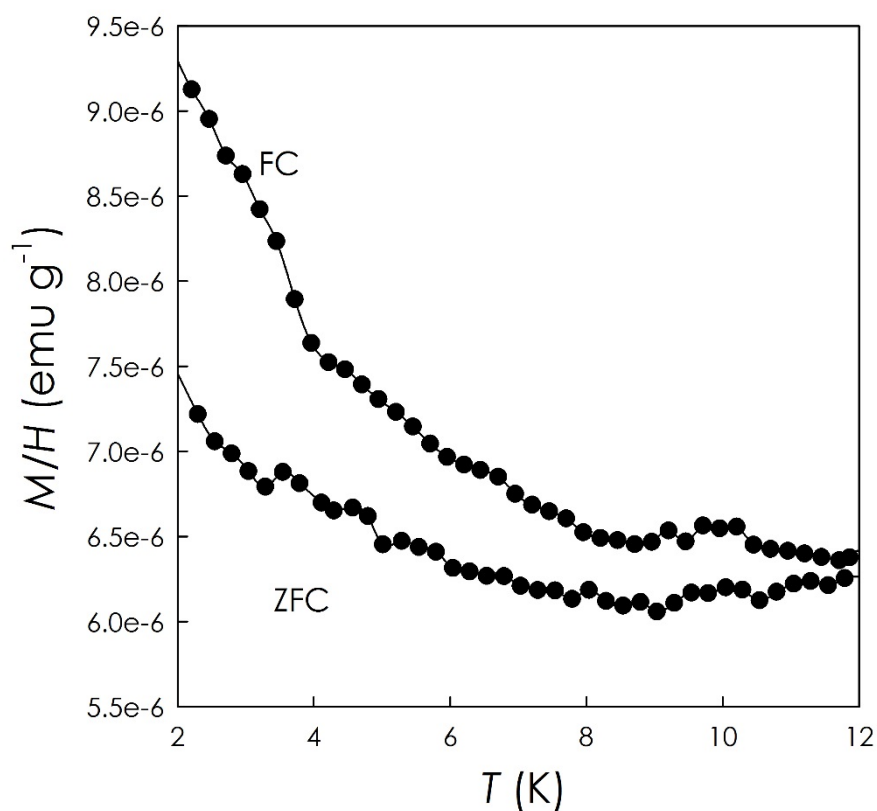

**Figure 1.** FC/ZFC measurement at 6 Oe on starting Sm.

RT: 0.00 - 34.46

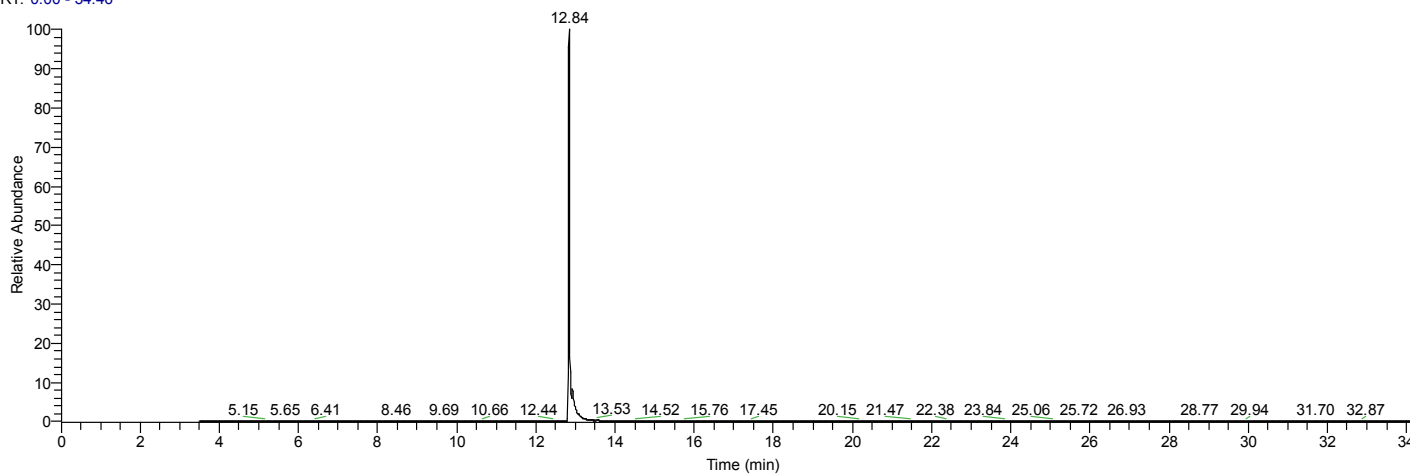

malvasi005 #866 RT: 12.84 AV: 1 SB: 2 15.50, 17.49 NL: 6.51E8  
T: + c Full ms [35.00-500.00]

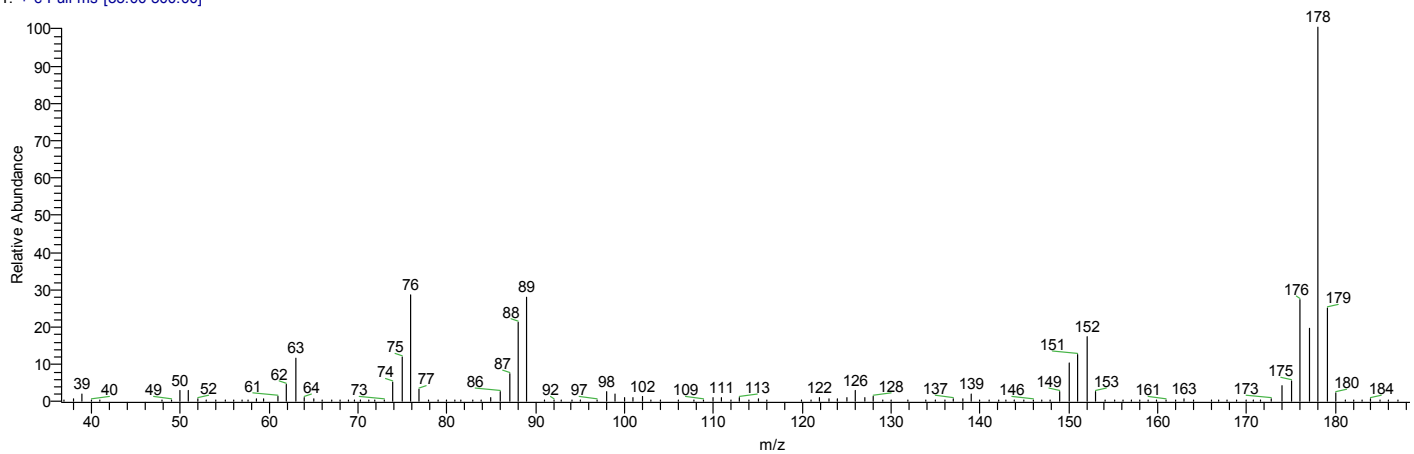

Figure 2. GC/MS spectrum of phenanthrene.

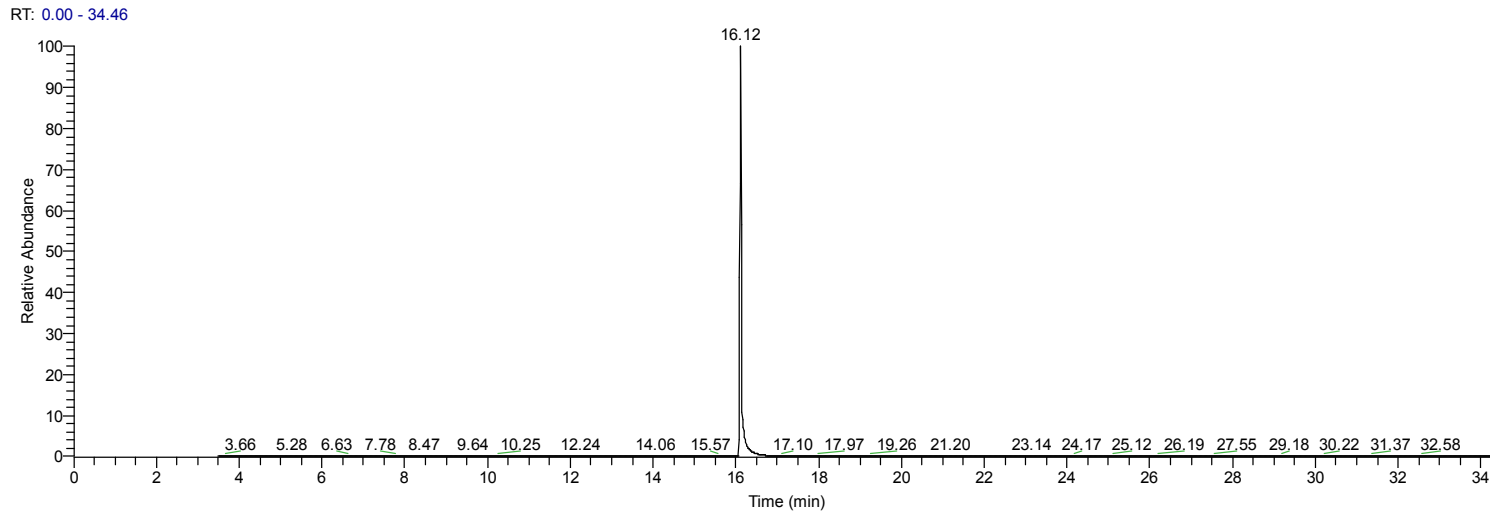

malavasi007 #1201 RT: 16.46 AV: 1 SB: 2 15.50, 17.48 NL: 3.12E6  
T: + c Full ms [35.00-500.00]

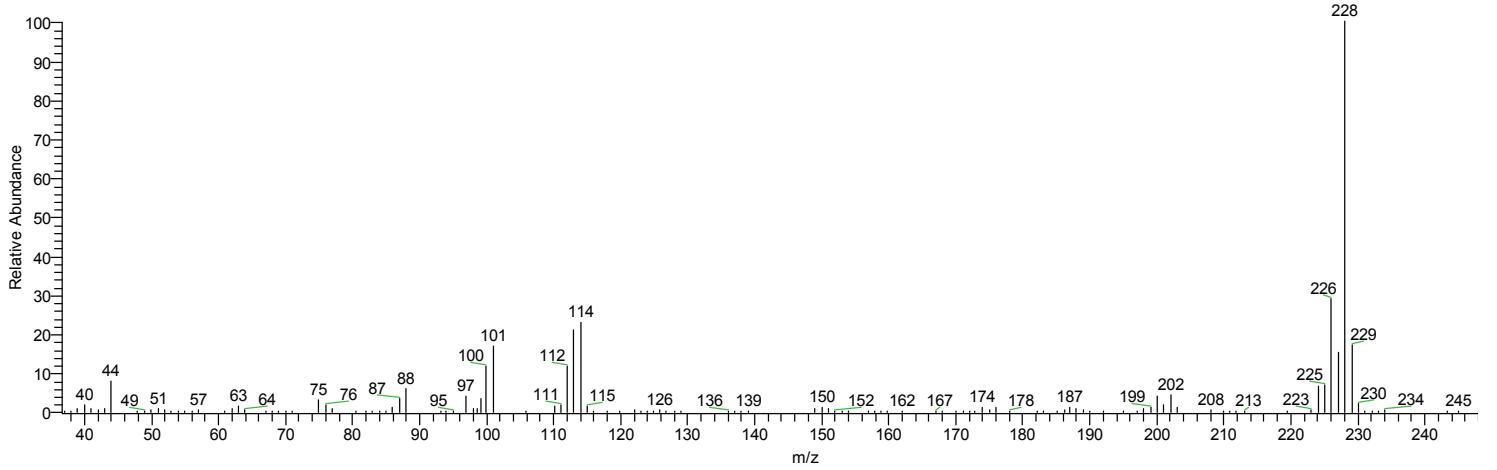

Figure 3. GC/MS spectrum of chrysene.
